# Supplementary material for: Elevated Src family kinase activity stabilizes E-cadherin-based junctions and collective movement of head and neck squamous cell carcinomas
Source: PubMed Central journal article supplement (PMC4480700; doi:10.18632/oncotarget.3071), 2014-12-26
Supplement: oncotarget-06-7570-s001.pdf [file oncotarget-06-7570-s001.pdf]

## Elevated Src family kinase activity stabilizes E-cadherin-based junctions and collective movement of head and neck squamous cell carcinomas

### Supplementary Material

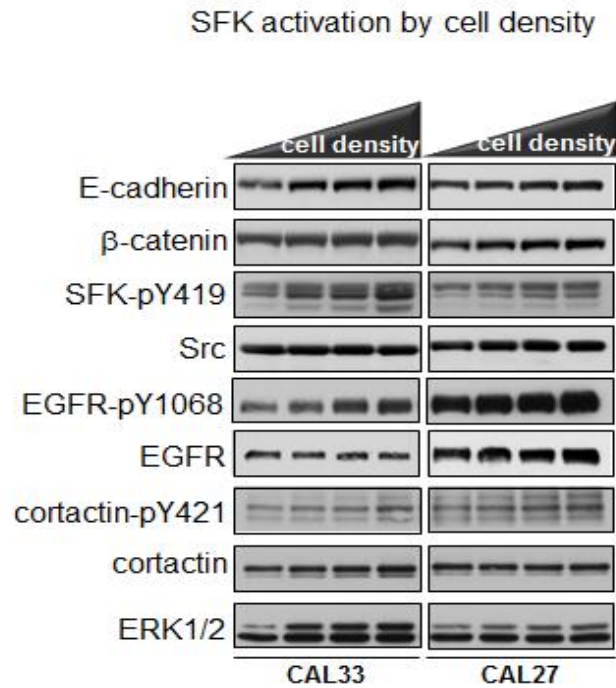

**Supplemental Figure 1: Effect of cell density on SFK phosphorylation.** Western blot of lysates of CAL33 and CAL27 cells plated at increasing density for 36h. ERK1/2 expression is shown as loading control.

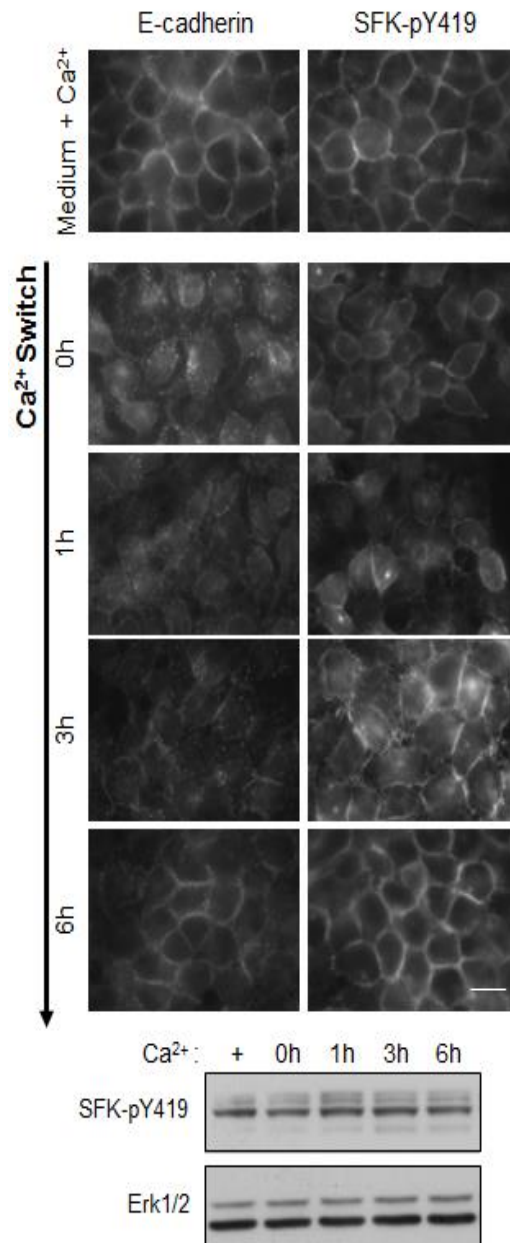

**Supplemental Figure 2: Effect of cell-cell adhesion on SFK phosphorylation : Calcium switch assay. (top)** Immunostaining of E-cadherin and phospho-SFK in CAL33 cells at the indicated times after switching cells from a Ca<sup>2+</sup>-deprived to Ca<sup>2+</sup> containing medium (bar=15µm). **(bottom)** Western blot analysis of SFK phosphorylation of CAL33 cell lysates following the Ca<sup>2+</sup> switch. Erk1/2 is visualized as loading control.

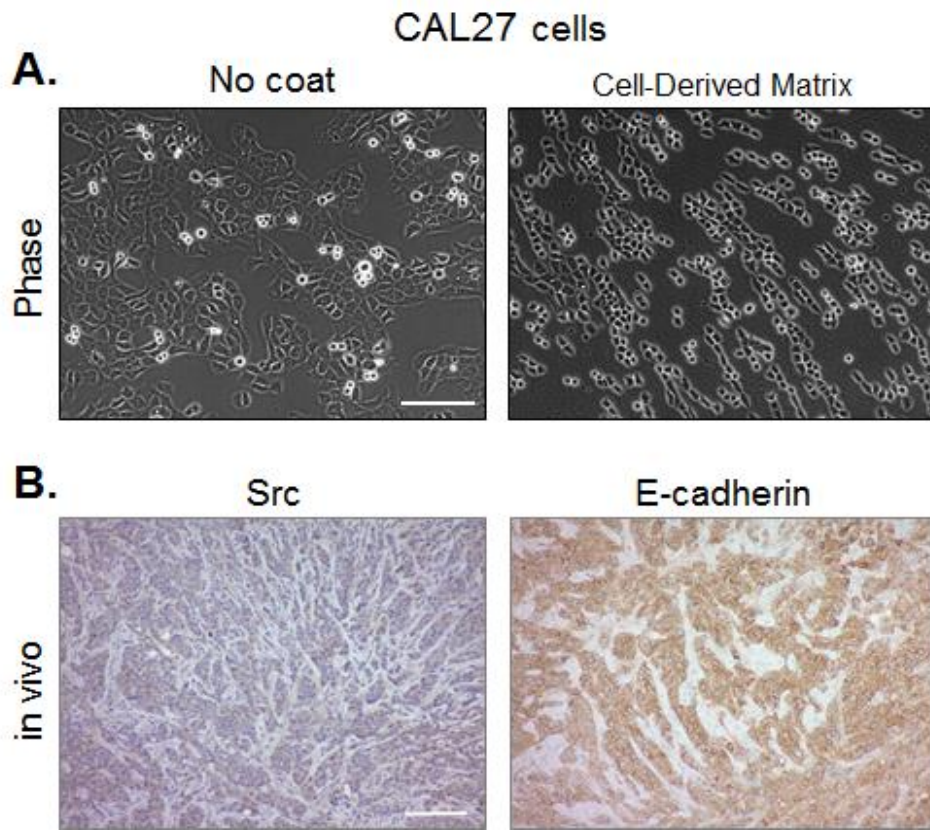

**Supplemental Figure 3: Similar organization of cohesive E-cadherin-positive CAL27 cell-derived tumor cell strands on cell-derived matrix and in vivo.** (A) CAL27 cells were plated on non-coated culture plates (left) or cell-derived matrix (right). Phase contrast images (bar=150 $\mu$ m) are shown. (B) Immunohistochemical staining of Src and E-cadherin in FFPE sections of CAL27-derived tumors isolated from mice (bar=200 $\mu$ m).
